# Supplementary material
Source: publisher figshare collection journal article supplement (https://acs.figshare.com/ndownloader/files/4189096)

**Mechanism of Inhibition of the GluA2 AMPA Receptor  
Channel Opening by 2,3-Benzodiazepine Derivatives:  
Functional Consequences of Replacing 7,8-Methylenedioxy  
with 7,8-Ethylenedioxy Moiety**

Mohammad S. Qneibi<sup>†</sup>, Nicola Micale<sup>‡</sup>, Silvana Grasso<sup>‡</sup>, and Li Niu<sup>†</sup>

<sup>†</sup>Department of Chemistry, and Center for Neuroscience Research, University at Albany, SUNY, Albany,  
New York 12222, United States

<sup>‡</sup>Dipartimento Farmaco-Chimico, Università di Messina, viale Annunziata, 98168 Messina, Italy

Running title: Inhibition of AMPA Receptors by GYKI 52466 Analogues

**Figure S1:** 2,3-BDZ-11-2 did not affect the channel desensitization rate constants on GluA2Q<sub>flip</sub>, determined at 100  $\mu$ M glutamate (●) and at 3 mM glutamate (○).

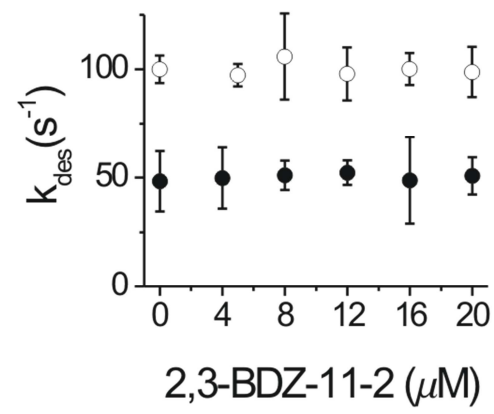

**Figure S2:** (A) Effect of 2,3-BDZ-11-2 on  $k_{cl}$  obtained at 100  $\mu\text{M}$  glutamate and as a function of 2,3-BDZ-11-2 concentration. From this plot, a  $\bar{K}_I^*$  of  $43 \pm 11 \mu\text{M}$  was obtained using eq 4 (all the equations are listed in Experimental Procedures). (B) Effect of 2,3-BDZ-11-2 on  $k_{op}$  obtained at 300  $\mu\text{M}$  glutamate and as a function of 2,3-BDZ-11-2 concentration. From this plot, a  $K_I^*$  of  $39 \pm 9.0 \mu\text{M}$  was determined using eq 5. Each data point shown in a plot was an average of at least three measurements collected from at least three cells.

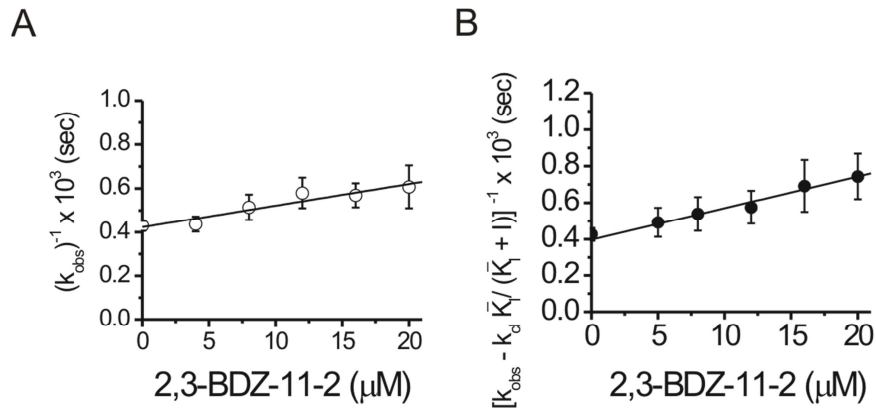

**Figure S3:** Effect of 2,3-BDZ-11-2 on the amplitude of the whole-cell current in the absence ( $A$ ) and presence ( $A_I$ ) of 2,3-BDZ-11-2, determined from the laser-pulse photolysis measurement. Using eqs 6a and 6b, we obtained a  $K_I$  of  $19 \pm 1.0 \mu\text{M}$  from the  $A/A_I$  value as a function of 2,3-BDZ-11-2 concentration ( $\bullet$ ) for the closed-channel state (or  $100 \mu\text{M}$  glutamate). At  $300 \mu\text{M}$  of photolytically released glutamate, the  $K_I$  was determined to be  $24 \pm 4.0 \mu\text{M}$  ( $\circ$ ). Each data point shown in this plot was an average of at least three measurements collected from at least three cells.

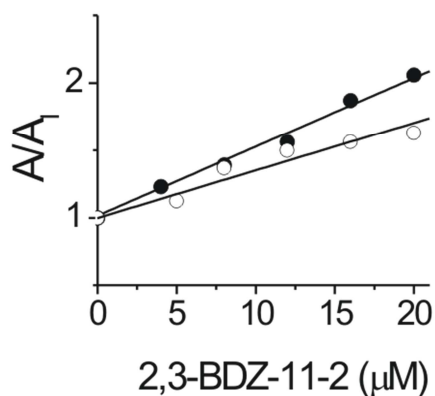

**Figure S4:** Inhibition constants of 2,3-BDZ-11-2 for the open-channel and the closed-channel states of GluA2Q<sub>flip</sub>, estimated from the amplitude of the whole-cell current by the solution flow measurement. At 3 mM glutamate (○), a  $\overline{K_I}$  of  $33 \pm 1.0 \mu\text{M}$  for the open-channel state was obtained by using eqs 6a and 6b. Similarly, a  $K_I$  of  $21 \pm 0.1 \mu\text{M}$  was obtained for the closed-channel state at the glutamate concentration of 100  $\mu\text{M}$  (●).

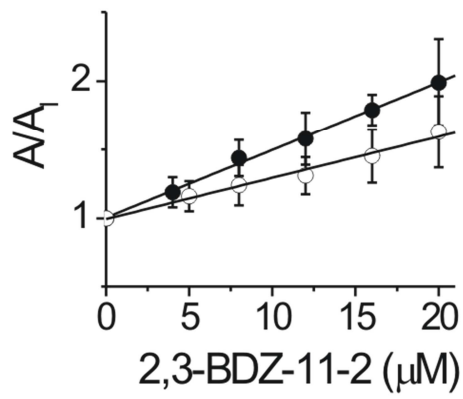

**Figure S5:** Inhibition constants of 2,3-BDZ-11-2 for the closed-channel state and open-channel states of the flop variant of GluA2 or GluA2Q<sub>flop</sub>, obtained from the amplitude of the whole-cell current in the absence and presence of the BDZ-11-2. The amplitude was collected by using the flow measurement. At 3 mM glutamate (○), a  $\overline{K_I}$  of  $33 \pm 1.0 \mu\text{M}$  was obtained, corresponding to the inhibition constant for the open state. At a glutamate concentration of 100  $\mu\text{M}$  (●), which corresponded to the closed-channel state, a  $K_I$  of  $25 \pm 0.3 \mu\text{M}$  was determined.

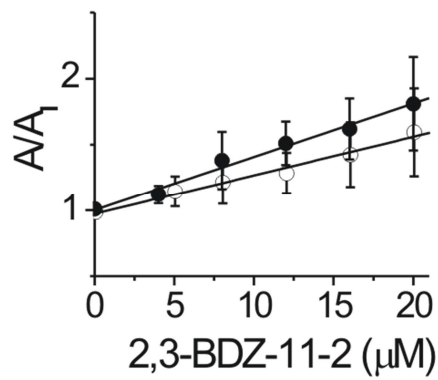

Supplement: Supplementary file 1 [file 4189096]
